# Supplementary material
Source: PubMed Central journal article supplement (PMC4598408)
Supplement: IAI.00767-15_zii999091437so1.pdf [file IAI.00767-15_zii999091437so1.pdf]

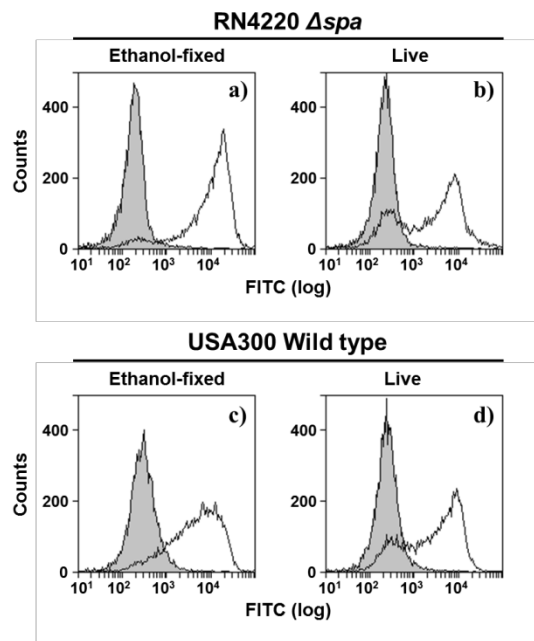

**Supplementary Fig. S1. C3 deposition capabilities of alcohol-fixed and live RN4220 *Δspa* mutant and USA300 strain by human sera.**

The *left* (*a, c*) and *right* (*b, d*) panels show the measurement of C3 depositions on ethanol-fixed and live cells of RN4220 (*a, b*) and USA300 (*c, d*) strains in 10% *Δspa* mutant-treated human serum without (*gray area*) or with anti-WTA IgG (50 ng; *black line*) in 20  $\mu$ l of buffer. Bound C3 were detected by specific FITC-labeled antibodies with flow cytometric analysis. The preparation method for *Δspa* mutant-treated human serum is described in the “Materials and Methods”. The results are representative of three independent experiments.
