# Supplementary material
Source: PubMed Central journal article supplement (PMC4598408)
Supplement: IAI.00767-15_zii999091437so2.pdf [file IAI.00767-15_zii999091437so2.pdf]

**Supplementary Table S1**

| Primer  | Sequence                                     | Application                  | Reference |
|---------|----------------------------------------------|------------------------------|-----------|
| N-up    | 5' ATGAAA AAATTTTCGAAAAGTAATTAAGAATC 3'      | Amplification of <i>tagN</i> | (1)       |
| N-dn    | 5' TCA CAA TAA ATT ATA AAATTC AGA CAT AGC 3' | Amplification of <i>tagN</i> | (1)       |
| tarM-up | 5' ATGAAAAAAATATTTATGATGGTACATGAGTTAGA 3'    | Amplification of <i>tarM</i> | (2)       |
| tarM-dn | 5' TTAGCTATTGAAAAGATTTAACCATTTTTCTAATA 3'    | Amplification of <i>tarM</i> | (2)       |
| tarS-up | 5' ATGATGAAATTTTCAGTAATAGTTCCAACATACAA 3'    | Amplification of <i>tarS</i> | (2)       |
| tarS-dn | 5' TTATTTTAGCGAGTAAGTCATATGTGCAGT 3'         | Amplification of <i>tarS</i> | (2)       |

- (1) **Winstel V, Liang C, Sanchez-Carballo P, Steglich M, Munar M, Broker BM, Penades JR, Nubel U, Holst O, Dandekar T, Peschel A, Xia G.** 2013. Wall teichoic acid structure governs horizontal gene transfer between major bacterial pathogens. *Nat Commun* **4**:2345.
- (2) **Winstel V, Kühner P, Salomon F, Larsen J, Skov R, Hoffmann W, Peschel A, Weidenmaier C.** 2015. Wall teichoic acid glycosylation governs *Staphylococcus aureus* nasal colonization. *mBio* **6**(4):e00632-15.
